# Supplementary material for: A Novel Phenoplast-Based Structural Electrolyte with High Ionic Conductivity and Fire Resistance for Advanced Energy Storage Composites
Source: Research Square preprint supplement (doi:10.21203/rs.3.rs-6027287/v1), 2025-02-19
Supplement: Supplementary file 1 [file 040f8473798f062b1ac35b1f.docx]

**Supplementary Information**

**A Novel Phenoplasts-Based Structural Electrolyte with High Ionic Conductivity and Fire Resistance for Advanced Energy Storage Composites**

Zhao Sha1, *, Ziyan Gao1, Yingkun Shen1, Cheng Wang1, Jiangtao Xu2, Shuying Wu3, Sonya A. Brown1, Shuhua Peng1, Jin Zhang1, Chun Hui Wang1, *

1 *School of Mechanical and Manufacturing Engineering, University of New South Wales, Sydney, Kensington, NSW 2052, Australia*

*2 School of Chemical Engineering, University of New South Wales, Sydney, Kensington, NSW 2052, Australia*

*3School of Aerospace, Mechanical and Mechatronic Engineering, The University of Sydney, Sydney, NSW 2006, Australia*

**Methods**

Materials

The following chemicals were used to develop the structural solid electrolyte in this study: phenolic resin (CELLOBOND J2027 X01, Hexion Inc., USA) and a catalyst (RESONANCE MC93-521, Hexion Inc., USA) in a weight ratio of 100:6; an ionic liquid (IL), 1-ethyl-3-methylimidazolium bis(trifluoromethylsulfonyl)imide (EMIM TFSI, Sigma-Aldrich); and a lithium salt, lithium bis(trifluoromethanesulfonyl)imide (LiTFSI, Sigma-Aldrich).

Miralon™ carbon nanotube (CNT) mats (thickness: 30 μm; Nanocomp Technologies, Inc., NH, USA) were used as electrodes in their as-received form for the composite structural supercapacitor developed in this study. A glass fibre veil with a thickness of approximately 50 μm was used as a separator.

Preparation of Phenolic Resin based Solid Electrolyte and Composite Structural Supercapacitor

The baseline electrolyte was prepared by mixing phenolic resin and IL in a mass ratio of 3:2 until a homogeneous mixture was obtained. It should be noted that the weight of the phenolic resin includes the catalyst content. To prepare electrolytes containing lithium salt, LiTFSI was first dissolved in the IL with the assistance of an ultrasonic water bath, with LiTFSI/IL mass ratios varying up to 0.5. The resulting mixture was then further mixed with phenolic resin at the appropriate ratios described in the main text. Once a homogeneous mixture was achieved, the electrolytes were cast into Teflon moulds designed for conductivity measurement samples (cylindrical shape with diameter ~10 mm and thickness ~4 mm) and tensile test samples (dog-bone shaped with dimensions 40 mm length, 10 mm width, and ~2 mm thickness). The electrolytes were cured in an oven, starting with 16 hours at 80 °C, followed by a 5-hour post-cure at 135 °C.

The composite structural supercapacitor was fabricated using a hand lay-up method. The CNT mat was cut to the size of 2 cm × 2 cm and attached to a small piece of copper foil as a current collector using silver paste. The homogeneous mixed electrolyte was applied evenly to one of the CNT mat electrodes until it was fully impregnated with the electrolyte. Then, the glass fibre veil was placed on top of this electrode, and electrolyte was applied to it in the same manner. The second CNT mat electrode was then stacked on the glass fibre veil separator, followed by the application of electrolyte. The composite structural supercapacitor was cured under the same conditions in an oven.

Measurement of Ionic Conductivities

Electrochemical impedance spectroscopy (EIS) was used to analyse the ionic conductivity of the produced solid-state polymer electrolytes. For sample preparation, the moulded cylindrical samples were polished with sandpaper prior to measurement. During EIS measurements, the cylindrical samples were clamped between two stainless steel blocking electrodes, and the complex impedance spectrum was recorded over the frequency range from 100 mHz to 100 kHz at an amplitude of 10 mV using a multi-potentiostat (Bio-Logic VSP-300). The impedance data, comprising real and imaginary components, were plotted in a Nyquist plot. The ionic conductivity was calculated using the equation 1:

(1)

where *σ* is the ionic conductivity (mS/cm), *t* is the thickness (cm), *A* is the contact area (cm2), and *Rb* (Ω) is the bulk resistance of solid electrolyte sample measured through EIS.

Capacitance Measurement for Composite Structural Supercapacitor

Electrochemical characterization of the composite structural supercapacitors was conducted using a two-electrode system. Cyclic voltammetry (CV) curves were measured at different scan rates ranging from 1 to 200 mV/s within a potential window from 0 to 2 V. The capacitance under constant voltage scan rate *Ck=const* (mF) is calculated based on the following equation,

(2)

where *I* is the current (mA), *A* is the surface area of the electrode (cm2), *k* is the scan rate (V/s), *Va* and *Vc* are the lower and upper sweeping voltages (V), respectively. In the present work, *Va* and *Vc* were set as 0 V and 2 V, respectively.

Mechanical Testing

Tensile tests were performed in accordance with ASTM D638 using a universal testing machine (Instron 3369, Illinois Tool Works Inc.) equipped with a 1 kN load cell, at a testing speed of 1 mm/min. The strain of the samples during tensile testing was monitored using a dynamic extensometer (Instron 2620–601).

Thermal Gravimetric Analysis (TGA) and Differential Scanning Calorimetry (DSC)

Thermogravimetric analysis (TGA) was carried out using a thermo-microbalance (Netzsch TG209) to evaluate the thermal stability of different electrolyte samples. The heating rate was set at 20 °C/min, increasing the temperature from room temperature (~26 °C) to ~900 °C under a nitrogen atmosphere. Differential scanning calorimetry (DSC) was performed using a Mettler Toledo DSC 1 to determine the degree of curing of the phenolic-based electrolytes. The samples were heated from 30 °C to 240 °C at a heating rate of 10 °C/min.

Flame Retardancy Test

A standard UL94 vertical burn test was performed using the GTT0082 UL94 apparatus (Fire Testing Technology) to evaluate the flame retardancy of the epoxy-based solid electrolyte and the phenolic-based solid electrolyte developed in this study. The sample dimensions were 125 mm × 13 mm × 2 mm, in accordance with the test standard.

Electron Microscopy and Spectroscopic Characterizations

The micro morphologies of the phenolic resin-based solid electrolytes were characterized using a scanning electron microscope (FEI Nova NanoSEM 450). Energy-dispersive X-ray spectroscopy (EDS) was conducted on as-prepared and washed electrolytes to identify changes in elemental composition.

Solid-state carbon-13 (13C) nuclear magnetic resonance (NMR) spectroscopy was performed using a Bruker Avance III 300 MHz solid-state NMR spectrometer to investigate the interaction mechanisms among phenolic resin, IL, and LiTFSI. Solid electrolyte samples, including pure phenolic resin polymer, were ground to a fine powder before measurement.

Fourier-transform infrared spectroscopy (FTIR) was conducted using a Shimadzu IRTracer-100 instrument in attenuated total reflection (ATR) mode over the wavenumber range of 500–4000 cm-1.

**References**

1. Grewal, M. S., Kisu, K., Orimo, S. & Yabu, H. Increasing the ionic conductivity and lithium-ion transport of photo-cross-linked polymer with hexagonal arranged porous film hybrids. *iScience* **25**, 104910 (2022).
